# Supplementary material for: Ding's herbal enema treats dextran sulfate sodium-induced colitis in mice by regulating the gut microbiota and maintaining the Treg/Th17 cell balance
Source: PubMed Central journal article supplement — Exp Ther Med. 2021 Sep 27;22(6):1368. doi: 10.3892/etm.2021.10802 (PMC8515548; doi:10.3892/etm.2021.10802), 2021-09-27

Figure S1. Determination of the concentration of  $\beta$ -sitosterol in DHEP. Gas chromatogram of (A)  $\beta$ -sitosterol standard and (B) DHEP. DHEP, Ding's herbal enema.

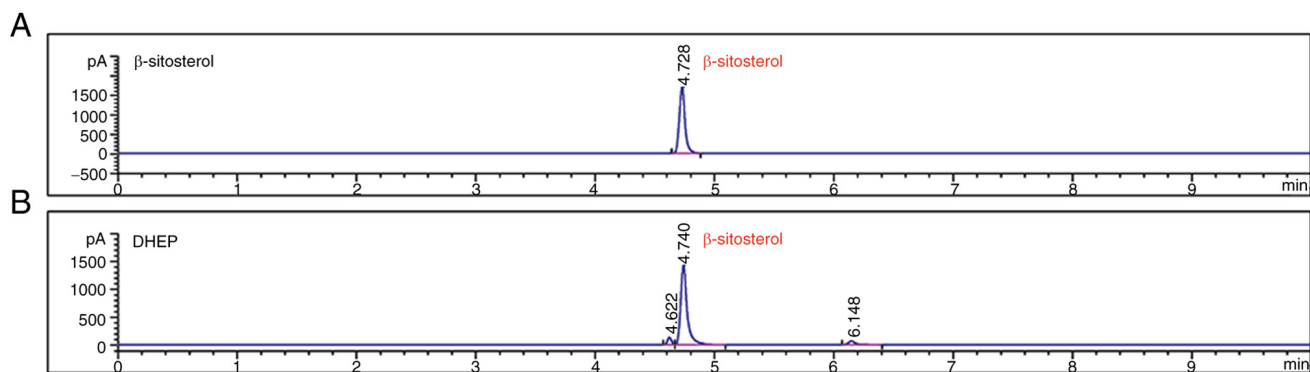

Supplement: Supplementary_Data.pdf [file Supplementary_Data.pdf]
